# Comparison of the Effects of Propylthiouracil and Selenium Deficiency on T<sub>3</sub> Production in the Rat\*

IRINI E. VERONIKIS†, LEWIS E. BRAVERMAN, SHARON ALEX, SHIH LIEH FANG, BETH NORVELL, AND CHARLES H. EMERSON

*Division of Endocrinology and Metabolism, University of Massachusetts Medical School, Worcester, Massachusetts 01655*

## ABSTRACT

Selenium deficiency and propylthiouracil (PTU) treatment both decrease hepatic type I T<sub>4</sub> 5'-deiodinase activity (5'D-I), which is considered to be an important regulator of the serum T<sub>3</sub> derived from peripheral T<sub>4</sub> to T<sub>3</sub> conversion (T<sub>3</sub> neogenesis). The effects of PTU treatment or a selenium-deficient diet on T<sub>4</sub> and T<sub>3</sub> kinetics were compared in thyroid-ablated rats infused with stable T<sub>4</sub> to determine whether PTU treatment is a more potent inhibitor of T<sub>3</sub> neogenesis than selenium deficiency and to compare the degree of inhibition of T<sub>3</sub> production with the degree of inhibition of 5'D-I. PTU treatment and selenium deficiency (Se<sup>-</sup>) did not affect the T<sub>3</sub> MCR (control, 46.0 ± 2.5; PTU, 41.7 ± 2.8; Se<sup>-</sup>, 41.1 ± 4.0 ml/h·100 g BW), but did reduce serum T<sub>3</sub> concentrations by 29% and 25%, respectively (control, 58.7 ± 2.6; PTU, 41.5 ± 1.0; Se<sup>-</sup>, 43.9 ± 2.7 ng/dl; *P* < 0.01 for PTU or Se<sup>-</sup> vs. control) and the T<sub>3</sub> production rate by 35% and 32%, respectively (control, 26.6 ± 1.0; PTU, 17.3 ± 2.0; Se<sup>-</sup>, 18.0 ± 1.9 ng/h·100 g BW; *P* < 0.01 for PTU or Se<sup>-</sup> vs. Control). PTU treatment and selenium deficiency significantly increased serum T<sub>4</sub> concentrations by 36%

and 32%, respectively, due to a decrease in T<sub>4</sub> MCR (control, 1.4 ± 0.1; PTU, 1.1 ± 0.1; Se<sup>-</sup>, 1.1 ± 0.04 ml/h·100 g BW; *P* < 0.05 for PTU or Se<sup>-</sup> vs. control). Assuming that the concentration of T<sub>4</sub> available for T<sub>3</sub> neogenesis is proportional to the serum T<sub>4</sub> concentration, the increase in serum T<sub>4</sub> concentrations caused by PTU treatment or Se<sup>-</sup> would probably have proportionally increased the rate of T<sub>3</sub> neogenesis. Based on these considerations, the apparent decrease in T<sub>3</sub> neogenesis in the PTU-treated animals was 52%. This is less than the 79% and 67% inhibition of 5'D-I noted, respectively, in the liver and kidneys of these rats. Similarly, the apparent decrease in T<sub>3</sub> neogenesis in the Se<sup>-</sup> rats was 48%, again less than the 85% and 64% inhibition of 5'D-I in their liver and kidneys, respectively. These studies suggest that PTU and Se<sup>-</sup> have similar effects on T<sub>3</sub> neogenesis. The more potent effects of these treatments on liver and kidney 5'D-I activities than on T<sub>3</sub> neogenesis suggest that the activities of these enzymes in these tissues are not the only important determinants of the serum T<sub>3</sub> that is derived from nonthyroidal sources. (*Endocrinology* 137: 2580–2585, 1996)

PREVIOUS STUDIES have suggested that type I 5'-deiodinase activity (5'D-I) is the major source, in euthyroid rats, of the T<sub>3</sub> in serum that is generated by peripheral deiodination of T<sub>4</sub> to T<sub>3</sub>. Experiments in athyreotic rats replaced with physiological doses of T<sub>4</sub> demonstrated that administration of propylthiouracil (PTU), a potent 5'D-I inhibitor, reduced serum T<sub>3</sub> concentrations or the T<sub>3</sub> production rate by as much as 77% (1–3). Surprisingly, in athyreotic selenium deficient (Se<sup>-</sup>) T<sub>4</sub>-replaced rats, in which 5'D-I activities in liver and kidney are significantly decreased (4–6) due to the fact that 5'D-I is a selenoprotein (7), the serum T<sub>3</sub> concentration was decreased by only 20% or less (8). It is difficult to explain the finding that serum T<sub>3</sub> concentrations decline to a far lesser extent in thyroidectomized T<sub>4</sub>-replaced rats that receive a Se<sup>-</sup> diet than in thyroidectomized T<sub>4</sub>-replaced rats treated with PTU (1–3, 8). To determine whether there is a discrepancy between the effects of Se<sup>-</sup> and PTU treatment and to evaluate the relative contribution of 5'D-I to the serum T<sub>3</sub> pool, we compared the effects of PTU and Se<sup>-</sup> on liver and

kidney 5'D-I activities and on the production of serum T<sub>3</sub> that arises by peripheral conversion of T<sub>4</sub> to T<sub>3</sub> in rats.

## Materials and Methods

These studies were approved by the animal research committee and complied with the institutional assurance certificate of the University of Massachusetts Medical Center. Weanling male Sprague-Dawley rats supplied by Charles River Laboratories (Wilmington, MA) were used. A preliminary study was performed to test the relationship between the dose of PTU administered in the diet and the degree of inhibition of 5'D-I in liver homogenates. Groups of rats (*n* = 4/group) received from 0–0.1% PTU in their diet. During this period, they were also treated with T<sub>4</sub> (1 μg/100 g BW twice daily) so that they would not be rendered hypothyroid by the PTU treatment. After 11 days of PTU and T<sub>4</sub> treatment, rats were killed, and 5'D-I in liver homogenates was measured as described below for the main kinetic study. The percent inhibition of 5'D-I in liver homogenates was similar in rats receiving either 0.01%, 0.05% or 0.1% PTU in their diet (92.8 ± 0.7% vs. 93.6 ± 1.8% vs. 95.0 ± 0.6%, respectively). Serum T<sub>4</sub>, T<sub>3</sub>, and TSH concentrations were also similar in the three groups of PTU-treated rats (serum T<sub>4</sub>, 8.5 ± 1.3, 10.2 ± 0.7, and 7.9 ± 1.8 μg/dl, respectively; serum T<sub>3</sub>, 44 ± 5, 43 ± 4, and 44 ± 6 ng/dl, respectively; serum TSH, 56 ± 14, 47 ± 7, and 38 ± 12 μU/ml, respectively).

## Experimental protocol

Three groups of rats were compared: a control group (C), a PTU-treated group, and a Se<sup>-</sup> group. Rats were housed in stainless steel cages and provided with distilled water containing 2% calcium lactate *ad libitum* for the duration of the study. Calcium lactate was provided in the drinking water because the rats were scheduled to undergo thyroidectomy in several days. A Torula yeast-based semisynthetic diet (Teklac

Received October 10, 1995.

Address all correspondence and requests for reprints to: Charles H. Emerson, M.D., Division of Endocrinology and Metabolism, University of Massachusetts Medical Center, 55 Lake Avenue North, Worcester, Massachusetts 01655.

\* This work was supported in part by Grants DK-18919 and DK-07302 from the NIH (Bethesda, MD).

† Present address: Division of Endocrinology and Metabolism, Boston University Medical School (Boston, MA).

Premier Laboratory Diets, Madison, WI) was used to provide a Se<sup>-</sup> diet. The Se<sup>-</sup> diet (TD 86298) contained less than 16 µg/kg selenium. This compares to 200 µg/kg in the Teklad selenium-sufficient diet (TD 91259).

All rats were surgically thyroidectomized under 70% ketamine-30% rompun anesthesia. This anesthesia was employed for all subsequent surgical procedures. Two days later, the Se<sup>-</sup> group was switched from standard laboratory chow to the Se<sup>-</sup> diet. Four days later, all rats were started on thyroid hormone replacement consisting of daily ip doses of T<sub>4</sub> (1.5 µg/100 g BW). Thirty days after the ip injections of T<sub>4</sub> were started, thyroid hormone replacement was switched from ip injections to continuous T<sub>4</sub> infusion. Miniosmotic pumps (Alza Corp., Palo Alto, CA) were primed by incubation in normal saline at 37 C for 4 h. They were weighed before and after filling to ensure correct loading and implanted sc under anesthesia, and their outflow was directed into the right atrium via a PE60 catheter (Clay Adams, Parsippany, NY). Before implantation, the pumps were loaded and calibrated to deliver T<sub>4</sub> at a rate of 1.5 µg/day·100 g BW and [<sup>125</sup>I]T<sub>3</sub> at a rate of 6 µCi/day·100 g BW. Three days before implantation of the miniosmotic pumps, the diets of the various groups of rats were changed from the pelleted to the powdered form, and PTU was added in a dose of 0.015% to the diet in the PTU group.

The infusion of stable T<sub>4</sub> and [<sup>125</sup>I]T<sub>3</sub> was maintained for 7 days. Rats were then anesthetized, and blood, liver, kidney, and osmotic minipumps were harvested. Livers and kidneys were homogenized in 4 vol (wt/vol) 250 mM sucrose, 20 mM HEPES buffer (pH 7.0), 1 mM EDTA, and 1 mM dithiothreitol (DTT) to measure their 5'D-I activities. Serum was separated from blood for measurement of thyroid hormone concentrations, chromatographic analysis of the <sup>125</sup>I-labeled constituents, and γ counting. The osmotic minipumps were analyzed for their residual [<sup>125</sup>I]T<sub>3</sub>. All tissue samples and serum were stored at -20 C until assayed.

### Serum hormone and tissue enzyme assays

Because the radioactivity of serum samples was high, Ciba Corning ACS 180 (Ciba Corning Diagnostic Corp., Medfield, MA) chemiluminescent immunoassays were used to measure serum T<sub>4</sub> and T<sub>3</sub> concentrations. To confirm the validity of these methods, they were compared with the rat serum T<sub>4</sub> and T<sub>3</sub> RIAs. The results using the two methods were highly correlated (T<sub>4</sub>: r = 0.968, P < 0.0001, n = 27; T<sub>3</sub>: r = 0.989, P < 0.0001, n = 10). Liver and kidney 5'D-I activities were determined by the release of <sup>125</sup>I from 10 µM rT<sub>3</sub> in the presence of 20 mM DTT at 37 C (9), and results were expressed as units per mg protein. One unit of enzyme activity represents the release of 1 pmol I<sup>-</sup>/min. In a complementary study, different substrate and/or DTT concentrations were employed to gauge the apparent inhibition of 5'D-I induced by PTU treatment. This study compared livers from rats receiving no PTU with livers from rats receiving 0.015% PTU in their diet, the same dose of PTU used for the main kinetic study. The enzyme assay conditions tested were 10 µM rT<sub>3</sub> with 20 mM DTT, 1 µM rT<sub>3</sub> with 20 mM DTT, 2 nM rT<sub>3</sub> with 20 mM DTT, 1 µM rT<sub>3</sub> with 1 mM DTT, and 2 nM rT<sub>3</sub> with 1 mM DTT. The percent inhibition of 5'D-I in the livers from PTU-treated rats was less when substrate concentrations of 10 µM rT<sub>3</sub> were used than with lower substrate concentrations. The values for the above concentrations were, respectively, 82.3 ± 1.6, 87.1 ± 1.1, 88.8 ± 0.4, 90.0 ± 0.6, and 91.5 ± 0.3 (n = 8/group; P < 0.01 for incubations performed with a rT<sub>3</sub> substrate concentration of 10 µM vs. incubations performed at lower substrate concentrations). In the presence of 1 mM PTU added *in vitro* to livers from PTU-treated rats, 5'D-I was inhibited by 95.7 ± 0.4% using enzyme assay conditions of 2 nM rT<sub>3</sub> with 20 mM DTT.

Serum TSH was measured by RIA using materials supplied by the

National Pituitary Agency, NIH, after samples were held to allow for decay of <sup>125</sup>I radioactivity. All samples were run in duplicate in the same assay and in random order. Protein was measured by the method of Bradford (10).

### Analysis of serum and osmotic minipumps for [<sup>125</sup>I]T<sub>3</sub>

Serum samples and aliquots of the [<sup>125</sup>I]T<sub>3</sub> solution that were loaded into the osmotic minipumps were counted in a Crystal Multi Detector γ-counter (Packard Instrument Co., Downers Grove, IL). To determine the fraction of the contents of the osmotic minipumps that had been infused into each rat, the minipumps were counted before they were implanted sc and again after they were removed from the rats. Counting was performed using a CRC-7 Radioisotope Calibrator (Capintec, Ramsey, NJ). After counting the osmotic minipumps, material from the pumps was removed, and it along with the serum samples and the [<sup>125</sup>I]T<sub>3</sub> solution used to load the pump were subjected to analysis by HPLC. One half milliliter of these samples was extracted with 1 ml methanol-1% NH<sub>3</sub>. After centrifugation at 2600 × g, the supernatant was concentrated under N<sub>2</sub>-gas to 0.1 ml. The samples were combined with 0.005 ml of a methanol-1% NH<sub>3</sub> solution containing stable iodide carrier and iodothyronine markers (NaI, monoiodotyrosine, diiodotyrosine, 3,5-diiodothyronine, T<sub>3</sub>, T<sub>4</sub>, and rT<sub>3</sub>). They were then subjected to HPLC using a 3.9 × 300-mm Waters C<sub>18</sub> µBondapak column (Millipore Waters Chromatography, Milford, MA). The column was equilibrated in 65% 0.1% trifluoroacetic acid-35% acetonitrile, and the bound iodothyronines were eluted at a flow rate of 1 ml/min using a linear gradient from 35–41% acetonitrile. Fractions were collected every minute, and the effluent was monitored at 24 nm to detect the specific iodothyronine peaks (11). The radioactivities of the fractions were measured in a Packard γ-counter, and the percentage of T<sub>3</sub> was calculated. This value was used to calculate the percentage of the total radioactivity that was authentic T<sub>3</sub>.

### T<sub>4</sub> and T<sub>3</sub> kinetics

Noncompartmental kinetics for T<sub>4</sub> and T<sub>3</sub> were calculated using the formula MCR = PR/PC, where MCR was the (plasma) MCR, PR was the production rate, and PC was the plasma concentration (12). The known factors in the formula were the stable T<sub>4</sub> and [<sup>125</sup>I]T<sub>3</sub> PCs and PRs, as these were obtained by measurement and by the infusion rates, respectively. The MCR of stable T<sub>4</sub> was calculated directly because the other elements of the formula were known. The MCR of [<sup>125</sup>I]T<sub>3</sub> was similarly calculated, and this value was used as the MCR for stable T<sub>3</sub>, thus permitting the PR of stable T<sub>3</sub> to be calculated (12).

### Statistics

Statistical significance of difference between the groups was determined by one-way ANOVA using the Student Newman-Keuls multiple comparisons test. All results are presented as the mean ± SE.

## Results

### T<sub>4</sub> infusion rate and body weight (Table 1)

The body weights of the different groups of rats were similar at the beginning and end of the period during which T<sub>4</sub> was infused by osmotic minipumps. The mean T<sub>4</sub> infusion rates were similar in the three groups and ranged from 172–

**TABLE 1.** Body weights and L-T<sub>4</sub> infusion rates in control, PTU-treated, and selenium-deficient (Se<sup>-</sup>) rats

| Group           | BW (g)      |              |          | T <sub>4</sub> (ng/h) | T <sub>4</sub> (µg/100 g · day) |
|-----------------|-------------|--------------|----------|-----------------------|---------------------------------|
|                 | Preinfusion | Postinfusion | Mean     |                       |                                 |
| Control         | 276 ± 10    | 314 ± 9      | 295 ± 10 | 172 ± 5               | 1.4 ± 0.05                      |
| PTU             | 277 ± 12    | 297 ± 20     | 287 ± 16 | 176 ± 9               | 1.5 ± 0.13                      |
| Se <sup>-</sup> | 294 ± 14    | 315 ± 15     | 304 ± 14 | 191 ± 5               | 1.5 ± 0.08                      |

Values are the mean ± SE.

191 ng/h. This corresponded to  $1.4 \pm 0.05 \mu\text{g } T_4/100 \text{ g mean BW}\cdot\text{day}$  in the C group and  $1.5 \pm 0.13$  and  $1.5 \pm 0.08$  in the PTU and  $\text{Se}^-$  groups, respectively. These values were similar to the intended infusion rate of  $1.5 \mu\text{g } 100 \text{ g BW}/\text{day}$ .

#### Liver and kidney 5'D-I activities in athyreotic $T_4$ -replaced rats

Liver 5'D-I activity was decreased by 79% in PTU-treated rats and by 85% in  $\text{Se}^-$  rats compared to that in the C groups ( $P < 0.001$ ; Fig. 1). Similarly, kidney 5'D-I activity was decreased by 67.2% and 63.5% in PTU-treated and  $\text{Se}^-$  rats, respectively ( $P < 0.001$ ; data not shown).

#### $T_4$ and $T_3$ kinetics

The serum  $T_4$  concentrations were modestly higher in the PTU-treated and  $\text{Se}^-$  groups of rats, by 36% and 32%, respectively ( $P < 0.05$ ; Fig. 2). A major reason for this was that the MCR of  $T_4$  was significantly decreased in both the PTU and  $\text{Se}^-$  groups, by 25% and 16%, respectively, compared to that in the C rats ( $P < 0.05$ ; Fig. 3). The relationship between the increase in serum  $T_4$  and the decrease in MCR in the PTU-treated and  $\text{Se}^-$  groups was not identical to that in the C group because these treated groups received slightly more  $T_4$  than the C group. Serum  $T_3$  concentrations were modestly decreased by both PTU and selenium deficiency ( $P < 0.001$ ; Fig. 4). Serum  $T_3$  values were  $58 \pm 2.6 \text{ ng/dl}$  in the C rats and decreased to  $41.5 \pm 1.0 \text{ ng/dl}$  in PTU-treated rats and to  $43.9 \pm 2.7 \text{ ng/dl}$  in the  $\text{Se}^-$  group. The MCR of  $T_3$  was slightly, but not significantly, lower in the PTU-treated and  $\text{Se}^-$  groups compared to that in the C rats (Fig. 5). Although selenium deficiency inhibited liver 5'D-I by 85% and kidney 5'D-I by 64%, the  $T_3$  production rate was decreased by only 32%. Similarly, PTU treatment decreased liver 5'D-I by 79% and kidney 5'D-I by 67%, but decreased  $T_3$  production by only 35% ( $P < 0.001$ ; Fig. 6).

#### Serum TSH concentrations

Mean serum TSH concentrations were almost identical in the C and  $\text{Se}^-$  rats. PTU-treated rats had significantly higher serum TSH concentrations compared to those in rats in the C or  $\text{Se}^-$  groups ( $P < 0.01$ ; Fig. 7).

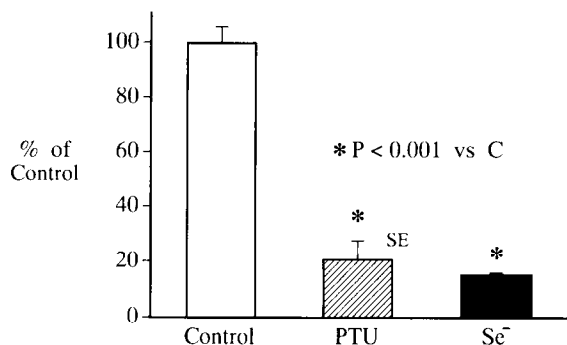

FIG. 1. Liver 5'D-I activity in C, PTU-treated, and  $\text{Se}^-$  thyroidectomized  $T_4$ -infused rats.

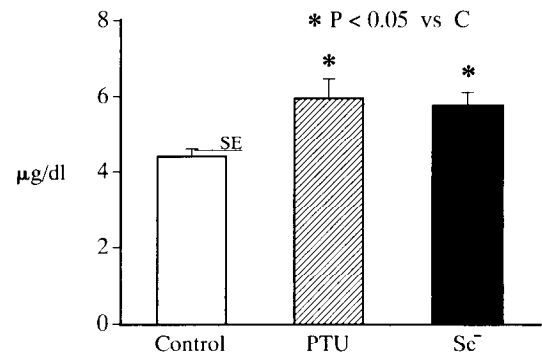

FIG. 2. Serum  $T_4$  concentrations in C, PTU-treated, and  $\text{Se}^-$  thyroidectomized  $T_4$ -infused rats.

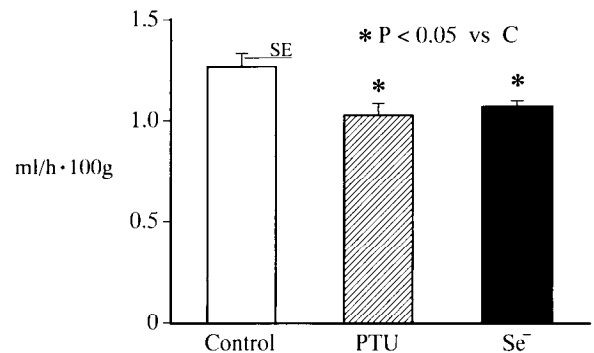

FIG. 3. MCR of  $T_4$  in C, PTU-treated, and  $\text{Se}^-$  thyroidectomized  $T_4$ -infused rats.

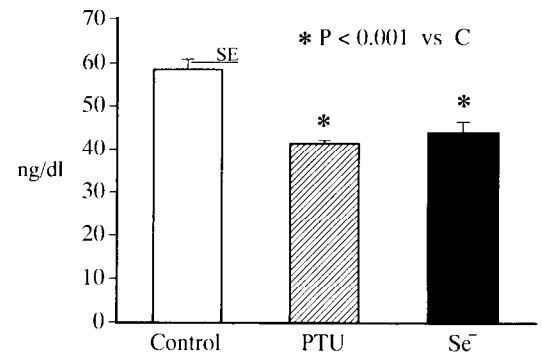

FIG. 4. Serum  $T_3$  concentrations in C, PTU-treated, and  $\text{Se}^-$  thyroidectomized  $T_4$ -infused rats.

## Discussion

5'D-I is an enzyme abundant in the liver and kidney, is inhibited by PTU, and is down-regulated in hypothyroidism and up-regulated in thyrotoxicosis (13). The 5'D-I enzyme has been cloned and is a selenoprotein (7, 14) with a selenocysteine at the enzyme's active site (7). Selenium-depleted liver and kidney have markedly diminished 5'D-I activity (4–6). Surprisingly, plasma  $T_3$  concentrations are decreased only modestly or not at all (4, 6, 15) in  $\text{Se}^-$  rats. Additionally, in recent experiments with  $\text{Se}^-$  thyroidectomized  $T_4$ -replaced rats, the serum  $T_3$  concentrations decreased by only 20% compared to those in selenium-sufficient rats (8). In contrast to the results in  $\text{Se}^-$  rats, previous experiments in athyreotic rats replaced with physiological doses of  $T_4$  or rats whose endogenous  $T_4$  production was inhibited demon-

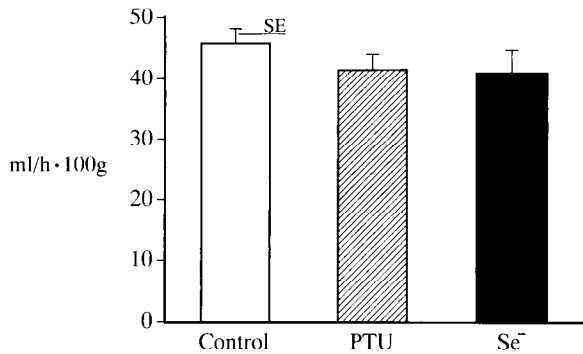

FIG. 5. MCR of T<sub>3</sub> in C, PTU-treated, and Se<sup>-</sup> thyroidectomized T<sub>4</sub>-infused rats.

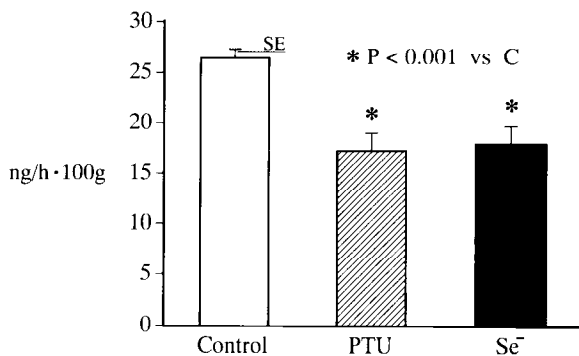

FIG. 6. The production rate of T<sub>3</sub> in C, PTU-treated, and Se<sup>-</sup> thyroidectomized T<sub>4</sub>-infused rats.

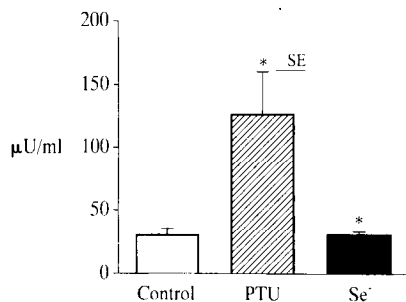

FIG. 7. Serum TSH concentrations in C, PTU-treated, and Se<sup>-</sup> thyroidectomized T<sub>4</sub>-infused rats.

strated that PTU administration reduced plasma T<sub>3</sub> concentrations or T<sub>3</sub> production rates by about 50–80% (1–3). Whereas the results in Se<sup>-</sup> rats suggested that 5'D-I might have a relatively small role in generating the plasma T<sub>3</sub> that comes from peripheral T<sub>4</sub> to T<sub>3</sub> conversion, the reports using PTU suggested that 5'D-I has a major role in this process (1–3, 16).

The present study directly compared the effects of both selenium deficiency and PTU administration on serum T<sub>4</sub> and T<sub>3</sub> concentrations and kinetics, and hepatic and kidney 5'D-I activities in T<sub>4</sub>-replaced, thyroid-ablated rats. Hepatic and kidney 5'D-I activities were equally inhibited by both treatments, and the serum T<sub>3</sub> concentrations and T<sub>3</sub> production rates were similarly decreased by both selenium deficiency and PTU treatment. The data in Se<sup>-</sup> rats extends the work of a previous study (8) by demonstrating that in athyreotic T<sub>4</sub>-replaced rats, selenium deficiency has similar ef-

fects on the production rate of serum T<sub>3</sub> and serum T<sub>3</sub> concentrations. In contrast, the findings in PTU-treated rats leave a different impression from that conveyed by earlier data (1–3) regarding the relative importance of 5'D-I in the generation of serum T<sub>3</sub> arising from peripheral conversion of T<sub>4</sub>. Frumess and Larsen (1), Larsen and Frumess (2), and van Doorn *et al.* (3) noted that plasma T<sub>3</sub> concentrations decreased by 47–77% in thyroidectomized T<sub>4</sub>-replaced rats treated with PTU compared to those in similar groups of rats that did not receive PTU. In the present study, PTU treatment was associated with a 28% decrease in plasma T<sub>3</sub> concentrations. Similarly, the PTU-induced decline in the T<sub>3</sub> production rate was 77% in the study of van Doorn *et al.* (3) and 35% in the present study.

The difference between the present study and previous reports (1–3) concerning the effect of PTU on serum T<sub>3</sub> levels or T<sub>3</sub> production in athyreotic T<sub>4</sub>-replaced rats does not appear to be related to differences in the doses of PTU employed. The dose of PTU administered in the present study was about 3.2 mg/rat-day. This is slightly more than the approximately 2.6 mg/day administered by some (1, 2) and somewhat less than the 5 mg/day administered in a third study (3). Moreover, in our preliminary study, doses of PTU that were lower as well as higher than the dose used in our kinetic studies caused similar degrees of inhibition of 5'D-I activity in liver homogenates. PTU was administered as a single daily dose by the ip route (1, 2) or was administered in the diet in the present study and that of van Doorn *et al.* (3). Oral administration of PTU is probably as efficient as ip administration because PTU is almost completely absorbed when administered by the oral route (16a). Oral doses of PTU are likely to result in more stable plasma PTU concentrations than ip doses because rats tend to feed throughout the lights-off period.

It follows that if similar doses of PTU were employed for the present and previous studies (1–3), it is unlikely that the lesser effect of PTU on serum T<sub>3</sub> concentrations or the T<sub>3</sub> production rate in our study is due to liver 5'D-I activity being less inhibited by PTU treatment. Tissue 5'D-I activities and *in vivo* T<sub>3</sub> production in the various studies cannot be compared, however, because they were both only measured in the present study. In a different study, Silva *et al.* (16) reported data on liver 5'D-I in rats receiving ip PTU treatment, but this was a study of the acute effects of PTU on the nuclear sources of T<sub>3</sub>. Furthermore, higher doses of PTU were administered (16) than in earlier studies (1, 2). In earlier studies (1, 2), PTU was administered in a dose of 1 mg/100 g BW-day, ip, whereas Silva *et al.* (16) administered 1 mg/100 g BW PTU, ip, 4.5, 18, and 28 h before the rats were killed. Using this higher PTU dose regimen, the inhibition of liver 5'D-I was 92.7%, a value greater than that reported in the present study. However, lower rT<sub>3</sub> substrate and DTT concentrations were used for the 5'D-I assay (16) than those employed in the present study (1 µM rT<sub>3</sub> vs. 10 µM rT<sub>3</sub> and 1 mM DTT vs. 20 mM DTT). As the data presented in *Materials and Methods* indicates, these lower rT<sub>3</sub> substrate and DTT concentrations result in a greater degree of *in vitro* 5'D-I inhibition in livers from PTU-treated rats. The percent inhibition of liver 5'D-I in the present study would have been significantly higher, therefore, had the rT<sub>3</sub> substrate concen-

trations and DTT concentrations used by Silva *et al.* (16) been employed in the present study. *In vivo* inhibition of 5'D-I may have been slightly submaximal in our study as well as in the study of Silva *et al.* (16). In the latter study, using enzyme assay conditions of 2 nM  $rT_3$  with 20 mM DTT, the addition of 1 mM PTU *in vitro* increased the inhibition of 5'D-I in the livers of PTU-treated rats from 92.7% to 98.6%. In the present study, using similar substrate and DTT concentrations, the addition of 1 mM PTU *in vitro* resulted in 95.7% inhibition of 5'D-I in livers from PTU-treated rats, about 7% greater inhibition than that noted in the absence of PTU added *in vitro* (see *Materials and Methods*).

It should be noted that some of the earlier studies (1, 2) were more concerned with the effect of PTU on thyroid hormone action in  $T_4$ -treated athyreotic rats. Accordingly, these studies did not derive kinetic data, and  $T_4$  was administered in bolus doses rather than by constant infusion as in the present study and that of van Doorn *et al.* (3). The former technique is not as satisfactory as constant infusion for non-compartmental kinetic studies.

One difference between the present study and the previous studies in thyroidectomized  $T_4$ -treated rats is that in the present study, there was little or no period after thyroid ablation during which  $T_4$  replacement was withheld. In contrast, in the studies of Frumess and Larsen (1, 2), there was a period of many weeks after thyroidectomy and before starting  $T_4$  replacement during which the rats were almost certainly hypothyroid because their growth plateaued. Similarly, in the van Doorn *et al.* study (3), there was a 2-month period after radiothyroidectomy during which no thyroid hormone was administered. In these rats, serum  $T_4$  and  $T_3$  were undetectable when assessed 6 weeks after thyroidectomy and 2 weeks before  $T_4$  and PTU were administered. The fact that there was a period of hypothyroidism before thyroid hormone replacement in previous studies (1–3), but not in the present report does not provide an obvious explanation for why extrathyroidal  $T_4$  to  $T_3$  conversion was more sensitive to PTU inhibition in previous studies.

PTU treatment and selenium deficiency also cause a decrease in the  $T_4$  MCR and thereby an increase in plasma  $T_4$  concentrations. This should provide increased  $T_4$  substrate concentrations for 5'D-I mediated deiodination and, if this were the only factor, cause serum  $T_3$  concentrations to increase. The increase in  $T_4$  substrate available for 5'D-I activity is probably directly proportional to the increase in serum  $T_4$  concentrations (17, 18). Based on the increase in serum  $T_4$ ,  $T_3$  production in PTU-treated rats should increase by 36% if 5'-deiodination of  $T_4$  is also not inhibited. In this context, the observed decrease in  $T_3$  production of 35% in PTU-treated rats can be viewed as equivalent to a 52% inhibition of  $T_3$  neogenesis. Although substantial, this is still less than the 79% and 67% inhibitions of 5'D-I noted, respectively, in the liver and kidneys of these rats. Similarly, the apparent decrease in  $T_3$  neogenesis in the  $Se^-$  rats was 48%. This is also less than the 85% and 64% inhibitions of 5'D-I noted, respectively, in their hepatic and renal tissues. The discrepancy between the decrease in  $T_3$  neogenesis and the inhibition of 5'D-I in liver and kidney homogenates would be even greater if the actual values for the  $T_3$  production rate were used as the index for  $T_3$  neogenesis or, in the case of PTU-

treated rats, if lower  $rT_3$  substrate concentrations were used to assess liver 5'D-I.

Kinetic studies performed by DiStefano and co-workers (19) demonstrated that 35% or less of the total  $T_3$  production rate was generated in the fast pool, postulated to be  $T_4$  to  $T_3$  conversion in the liver and kidney. The bulk of the  $T_3$  production rate (53%) was suggested to be generated by  $T_4$  to  $T_3$  conversion in tissues that constitute the slow pool, *i.e.* extrahepatic and extrarenal tissues such as heart and muscle (19). If this is indeed the case, our results suggest that these slow pool sites are resistant to both  $Se^-$  diets and PTU treatment and/or must have a large store of preformed  $T_3$  available to the blood (20). One possibility is that there are tissues that conserve selenium despite the low selenium diets, such as the thyroid (8). Although extremely unlikely, it is possible that there are 5'D-I enzymes that are not selenoproteins. It is also possible that PTU does not reach sufficiently high concentrations to inhibit 5'D-I activity at the slow pool sites.

Other possibilities currently being considered are that the increased  $T_3$  sulfate generation in the liver, reported to occur with both selenium deficiency and PTU administration (6, 21), could result in increased availability of  $T_3$  for absorption across the gut mucosa after removal of the sulfate by bacterial sulfatase activity (22–24), but this is probably not the case (25). Another possibility is that type II deiodinase activity participates in the extrathyroidal production of serum  $T_3$  even in euthyroid rats (25a). Genetic rat models with knock-out 5'D-I and other deiodinase gene mutations are probably the most efficacious way to unravel some of the possibilities outlined above.

In an earlier study (1) it was noted that serum TSH concentrations were higher in thyroid-ablated  $T_4$ -injected rats that were treated with PTU than in those that did not receive PTU. This was consistent with the fact that in that study, PTU treatment reduced serum  $T_3$  concentrations by 49–63%. We also noted significantly higher serum TSH concentrations in thyroid-ablated  $T_4$ -treated rats that received PTU compared to those that did not receive PTU. As noted, however, PTU treatment resulted in a far more modest decrease in serum  $T_3$  than previously observed. Interestingly, unlike the PTU-treated group, serum TSH concentrations were not increased in the  $Se^-$  group despite the fact that the effects of PTU treatment and selenium deficiency on serum  $T_3$  and  $T_4$  concentrations in the thyroid-ablated  $T_4$ -infused rats were similar. This raises the possibility that the intrapituitary deiodination of  $T_1$  to  $T_3$  by the PTU-resistant 5'D-II isoenzyme and 5'D-I is different in PTU-treated and  $Se^-$  rats. Selenium deficiency is associated with a decrease in pituitary 5'D-II activity (15), perhaps due to the increased serum  $T_4$  concentrations, as this isoenzyme is directly related to thyroid status, although 5'D-II might also be a selenoenzyme (26), as has been reported for inner ring or 5D (27). In contrast, PTU administration does not affect 5'D-II activity (28), yet serum TSH increased only in the PTU-treated rats despite the similar small decreases in serum  $T_3$  values in PTU-treated and  $Se^-$  rats. This observed dichotomy requires further study.

In conclusion, inhibition of peripheral liver and kidney 5'D-I activities by either selenium deficiency or PTU treatment in athyreotic  $T_4$ -replaced rats results in modest decreases in serum  $T_3$  values and  $T_3$  production. These findings

are consistent with the recent report that serum T<sub>3</sub> concentrations are not reduced in mice with inherited deficiency of 5'D-I (29). They are also similar to studies in athyreotic humans receiving T<sub>4</sub> replacement. In these patients, PTU treatment causes a modest decline of about 20–30% in serum T<sub>3</sub> concentrations, but unlike the findings in the rat, serum T<sub>4</sub> concentrations did not increase (30, 31). In the rat and perhaps also in the human, 5'D-I-mediated T<sub>4</sub> to T<sub>3</sub> conversion, at least in the liver and kidney, does not account for a substantial fraction of the circulating T<sub>3</sub> that arises from peripheral T<sub>4</sub> to T<sub>3</sub> conversion. Perhaps other tissues, such as muscle and heart, might contribute to maintaining serum T<sub>3</sub> concentrations by generating T<sub>3</sub> from T<sub>4</sub> by PTU-insensitive pathways, by PTU not reaching sufficient concentrations to inhibit 5'D-I, or by releasing a large pool of tissue T<sub>3</sub> that is not mobilized unless there is a threat to the maintenance of normal plasma T<sub>3</sub> levels.

### References

1. **Frumess RD, Larsen PR** 1975 Correlation of serum triiodothyronine (T<sub>3</sub>) with biologic effects of thyroid hormone replacement in propylthiouracil-treated rats. *Metabolism* 24:547–554
2. **Larsen PR, Frumess RD** 1977 Comparison of the biological effects of thyroxine and triiodothyronine in the rat. *Endocrinology* 100: 980–988
3. **van Doorn J, Roelfsema F, van der Heide D** 1983 The effect of propylthiouracil and methimazole on the peripheral conversion of thyroxine to 3,5,3'-triiodothyronine in athyreotic thyroxine maintained rats. *Acta Endocrinol (Copenh)* 103:509–520
4. **Beckett GJ, Beddows SE, Morrice PC, Nicol F, Arthur JR** 1987 Inhibition of hepatic deiodination of thyroxine is caused by selenium deficiency in rats. *Biochem J* 248:443–447
5. **Beckett GJ, MacDougall DA, Nicol F, Arthur JR** 1989 Inhibition of type I and type II iodothyronine deiodinase activity in the rat liver, kidney and brain produced by selenium deficiency. *Biochem J* 259: 887–892
6. **Chanoine JP, Safran M, Farwell AP, Dubord S, Alex S, Stone S, Arthur JR, Braverman LE, Leonard JL** 1992 Effects of selenium deficiency on thyroid hormone economy in rats. *Endocrinology* 131:1787–1792
7. **Berry MJ, Banu L, Larsen PR** 1991 Type I iodothyronine deiodinase is a selenocysteine-containing enzyme. *Nature* 349:438–440
8. **Chanoine JP, Braverman LE, Farwell AP, Safran M, Alex S, Dubord S, Leonard JL** 1993 The thyroid gland is the major source of circulating T<sub>3</sub> in the rat. *J Clin Invest* 91:2709–2713
9. **Leonard JL, Rosenberg IN** 1980 Iodothyronine 5'-deiodinase from rat kidney: substrate specificity and the 5'-deiodination of reverse triiodothyronine. *Endocrinology* 107:1376–1383
10. **Bradford MM** 1976 A rapid and sensitive method for the quantitation of microgram quantities of protein utilizing the principle of protein-dye binding. *Anal Biochem* 72:248–254
11. **Castro MI, Braverman LE, Alex S, Wu CF, Emerson CH** 1985 Inner ring deiodination of 3,5,3'-triiodothyronine in the in situ perfused guinea pig placenta. *J Clin Invest* 76:1921–1926
12. **Trait JF, Horton R** 1966 The in vivo estimation of blood production and inter-conversion rates of androstenedione and testosterone and the calculation of steroid secretion rates. In: Pincus G, Nakao T, Trait JF (eds) *Steroid Dynamics*. Academic Press, New York, p 393
13. **Leonard JL** 1990 Identification and structure analysis of iodothyronine deiodinases. In: Greer MA (ed) *The Thyroid Gland*. Raven Press, New York, pp 285–305
14. **Berry MJ, Larsen PR** 1992 The role of selenium in thyroid hormone action. *Endocr Rev* 13:207–219
15. **Chanoine JP, Safran M, Farwell AP, Tranter P, Ekenbarger D, Dubord S, Alex S, Arthur JR, Beckett GJ, Braverman LE, Leonard JL** 1992 Selenium deficiency and type II 5'-deiodinase regulation in the euthyroid and hypothyroid rat: evidence of a direct effect of thyroxine. *Endocrinology* 131:479–484
16. **Silva JE, Leonard JL, Crantz FR, Larsen PR** 1982 Evidence of two tissue-specific pathways for in vivo thyroxine 5'-deiodination in the rat. *J Clin Invest* 69:1176–1184
- 16a. **Cooper DS** 1991 Treatment of Thyrotoxicosis. In: Braverman LE, Utiger RD (eds) *Werner and Ingbar's The Thyroid*, ed 6. Lippincott, Philadelphia, pp 887–916
17. **Mendel CM, Weisiger RA, Cavalieri RR** 1988 Uptake of 3,5,3'-triiodothyronine by the perfused rat liver: return to the free hormone hypothesis. *Endocrinology* 1817–1824
18. **Docter R, DeJong M, van der Hoek HJ, Krenning EP, Hennemann G** 1990 Development and use of a mathematical two-pool model of distribution and metabolism of 3,3',5'-triiodothyronine in a recirculating rat liver perfusion system: albumin does not play a role in cellular transport. *Endocrinology* 126:451–459
19. **DiStefano JJ, Jang M, Malone TK, Broutman M** 1982 Comprehensive kinetics of triiodothyronine production, distribution, and metabolism in blood and tissue pools of the rat using optimized blood-sampling protocols. *Endocrinology* 110:198–213
20. **Obregon MJ, Mallot J, Escobar Del Ray F, Morreale De Escobar G** 1981 Presence of L-thyroxine and 3,5,3'-triiodo-L-thyronine in tissues from thyroidectomized rats. *Endocrinology* 109:908–913
21. **Rutgers M, Bonthuis F, de Herder WW, Visser TJ** 1987 Accumulation of plasma triiodothyronine sulfate in rats treated with propylthiouracil. *J Clin Invest* 80:758–762
22. **De Herder WW, Harenberg MP, Pennock-Schoder AM, Hennemann G, Visser TJ** 1986 Hydrolysis of iodothyronine glucuronides by obligately anaerobic bacteria isolated from human fecal flora. *FEMS Microbiol Lett* 35:249–253
23. **Hazenber MP, de Herder WW, Visser TJ** 1988 Hydrolysis of iodothyronine conjugates by intestinal bacteria. *FEMS Microbiol Rev* 54:9–16
24. **De Herder WW, Hazenberg MP, Pennock-Schoder AM, Oosterlaken AC, Rutgers M, Visser TJ** 1989 On the enterohepatic cycle of triiodothyronine in rats: importance of the intestinal microflora. *Life Sci* 45:849–856
25. **Veronikis IE, Alex S, Fang SL, Wright GE, Emerson CH** 1995 Serum iodothyronine concentrations in intestinally decontaminated rats treated with type I T<sub>4</sub> 5'-deiodinase inhibitor. *Thyroid* 5:S-126 (Abstract)
- 25a. **Silva JE, Gordon MB, Crantz FR, Leonard JL, Larsen PR** 1984 Qualitative and quantitative differences in the pathways of extrathyroidal triiodothyronine generation between euthyroid and hypothyroid rats. *J Clin Invest* 73:898–907
26. **Davey JC, Becker KB, Schneider MJ, St Germain DL, Galton VA** 1995 Cloning of a cDNA for the type II iodothyronine deiodinase. *J Biol Chem* 270:26786–26789
27. **St. Germain DL, Schwartzman RA, Croteau W, Kanamori A, Wang Z, Brown DD, Galton VA** 1994 A thyroid hormone-regulated gene in *Xenopus laevis* encodes a type III iodothyronine 5-deiodinase. *Proc Natl Acad Sci USA* 91:7767–7771
28. **Visser TJ, Kaplan MM, Leonard JL, Larsen PR** 1983 Evidence for two pathways of iodothyronine 5'-deiodination in rat pituitary that differ in kinetics, propylthiouracil sensitivity, and response to hypothyroidism. *J Clin Invest* 71:992–1002
29. **Schoenmakers CHH, Pigmans IGJ, Poland A, Visser TJ** 1993 Impairment of the selenoenzyme type I iodothyronine deiodinase in C<sub>3</sub>H/He mice. *Endocrinology* 132:357–361
30. **Saberi M, Sterling FH, Utiger RD** 1975 Reduction in extrathyroidal triiodothyronine production by propylthiouracil in man. *J Clin Invest* 55:218–223
31. **Geffner DL, Azukizawa M, Hershman JM** 1975 Propylthiouracil blocks extrathyroidal conversion of thyroxine to triiodothyronine and augments thyrotropin secretion in man. *J Clin Invest* 55:224–229
